# Supplementary material for: Dynamics of anion exchange in cesium lead halide (CsPbX3) perovskite nanocrystals
Source: Royal Society of Chemistry journal article supplement (doi:10.1039/d0nj04987e), 2020-01-01
Supplement: d0nj04987e1.pdf [file d0nj04987e1.pdf]

## Supporting information

### Dynamics of Anion Exchange in Cesium Lead Halide ( $\text{CsPbX}_3$ ) Perovskite Nanocrystals

Yuhang Sheng,<sup>a</sup> Aiqing Zhao,<sup>a</sup> Songyan Yuan,<sup>a</sup> Cihui Liu,<sup>a</sup> Xiaowei Zhang,<sup>b</sup> Yunsong Di,<sup>a</sup> and Zhixing Gan<sup>\*a,c</sup>

- Center for Future Optoelectronic Functional Materials, School of Computer and Electronic Information/School of Artificial Intelligence, Nanjing Normal University, Nanjing 210023, China Email: zxgan@njnu.edu.cn
- Department of Electrical Engineering and Computer Science, Ningbo University, Ningbo, 315211, China
- College of Materials Science and Engineering, Qingdao University of Science and Technology, Qingdao 266042, P. R. China

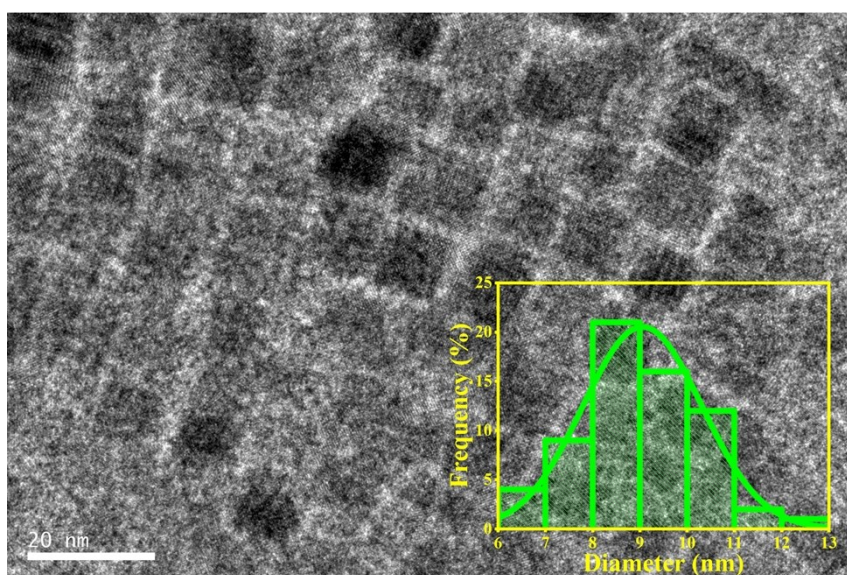

Figure S1: TEM image of the as-synthesized  $\text{CsPbBr}_3$  PNCs. Inset: size distribution of the  $\text{CsPbBr}_3$  PNCs.

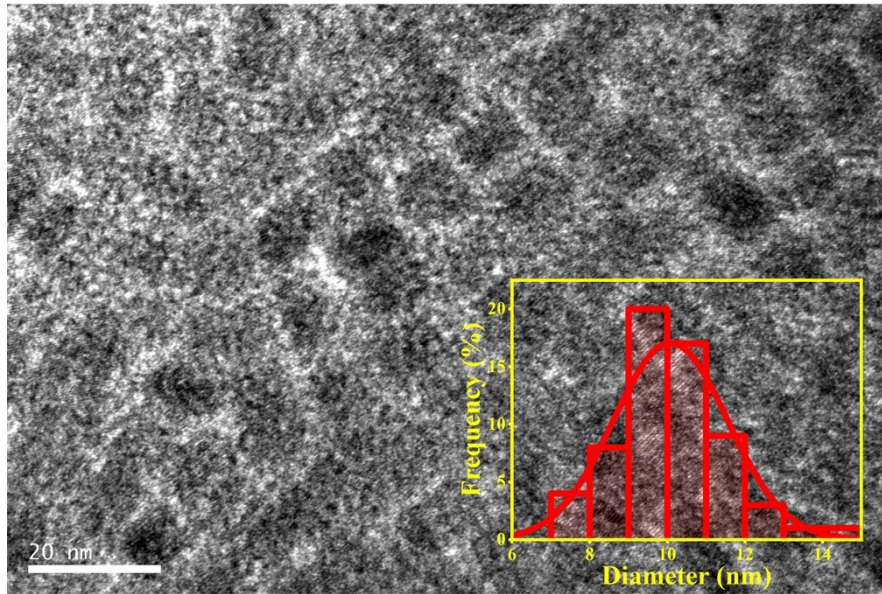

Figure S2: TEM image of the as-synthesized CsPb(Br<sub>0.09</sub>/I<sub>0.91</sub>)<sub>3</sub> PNCs. Inset: size distribution of the CsPb(Br<sub>0.09</sub>/I<sub>0.91</sub>)<sub>3</sub> PNCs.

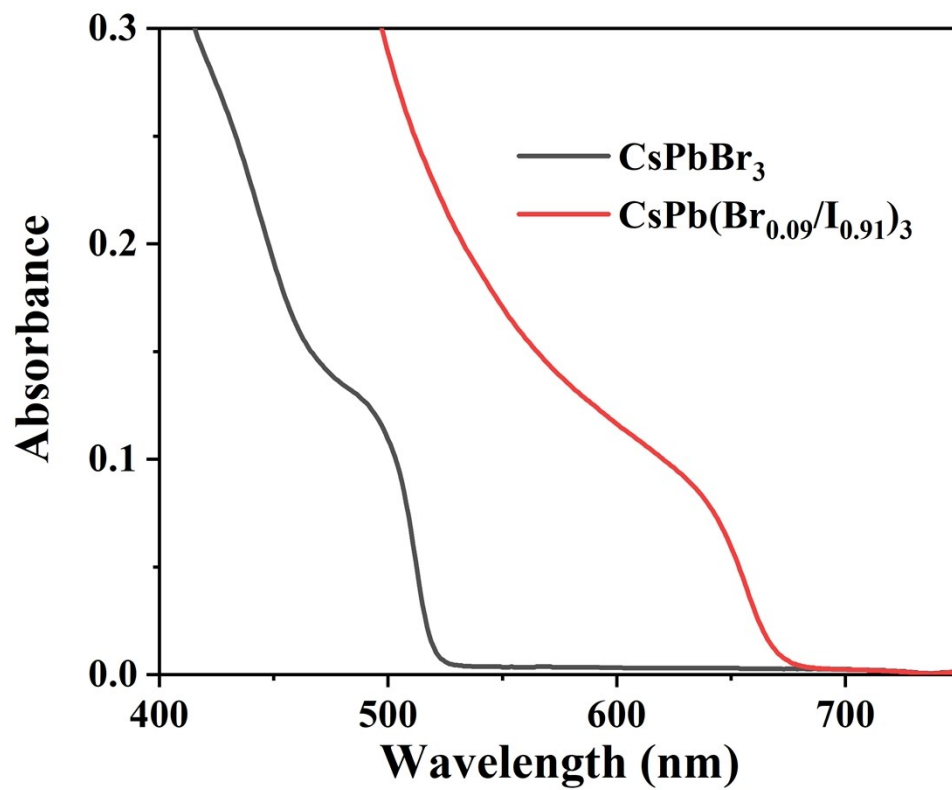

Figure S3: Absorption spectra of CsPbBr<sub>3</sub> and CsPb(Br<sub>0.09</sub>/I<sub>0.91</sub>)<sub>3</sub> PNCs.

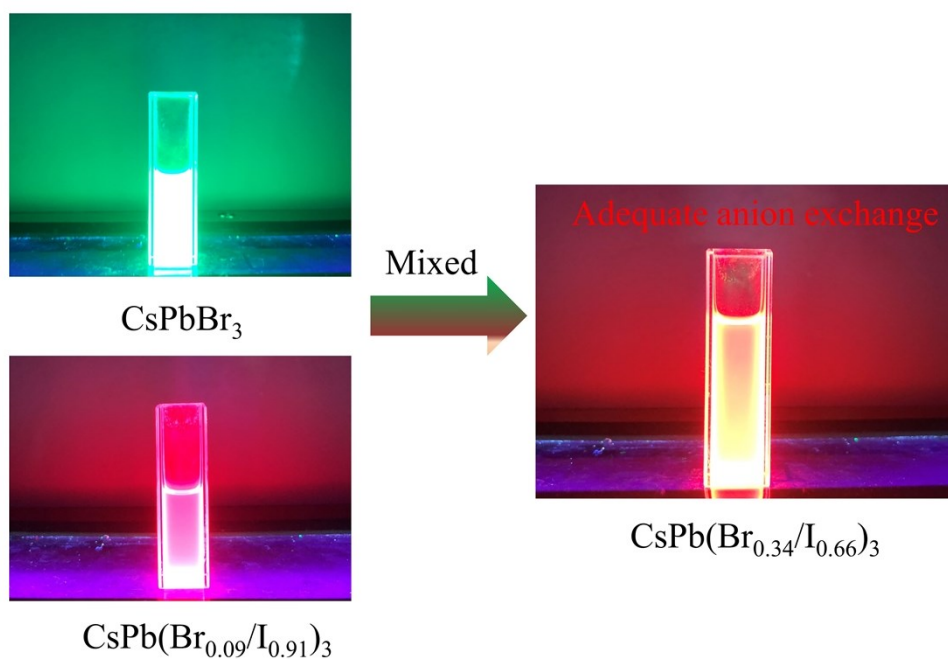

Figure S4: The fluorescent images of the initial  $\text{CsPbBr}_3$  and  $\text{CsPb}(\text{Br}_{0.09}/\text{I}_{0.91})_3$  PNCs before anion exchange (left), and the mixture after adequate anion exchange (right).

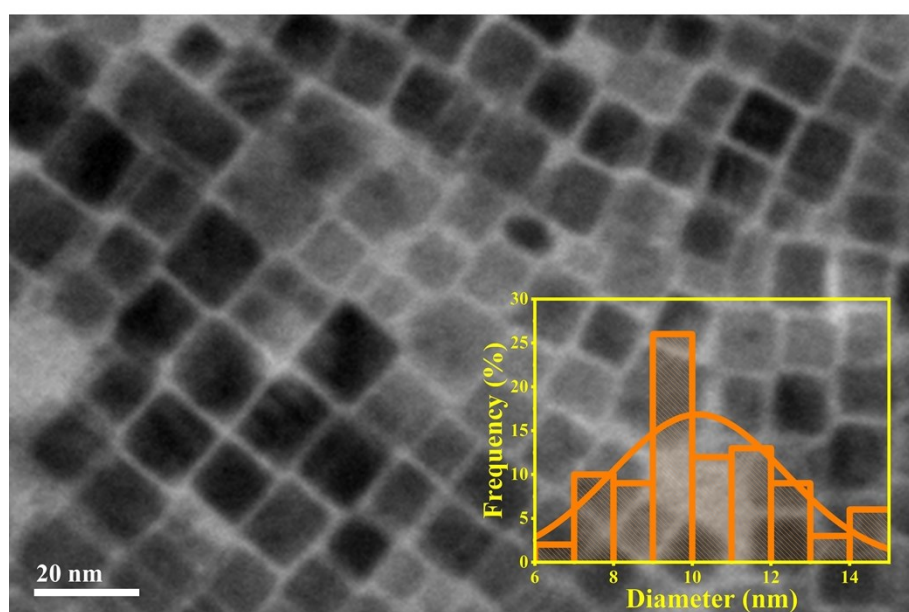

Figure S5: TEM image of the final  $\text{CsPb}(\text{Br}_{0.34}/\text{I}_{0.66})_3$  PNCs after the anion exchange process. Inset: size distribution of the  $\text{CsPb}(\text{Br}_{0.34}/\text{I}_{0.66})_3$  PNCs.

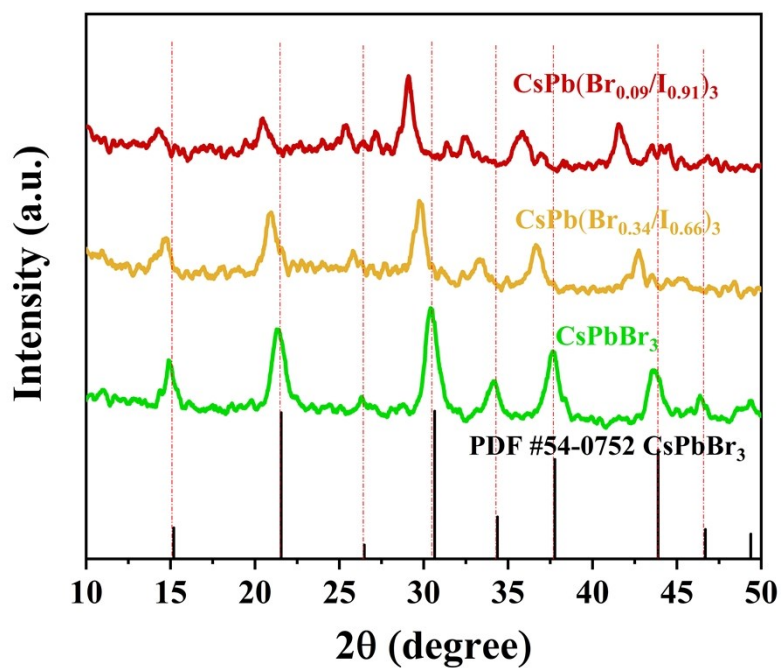

Figure S6: X-ray diffraction patterns for the parent PNCs and final PNCs.

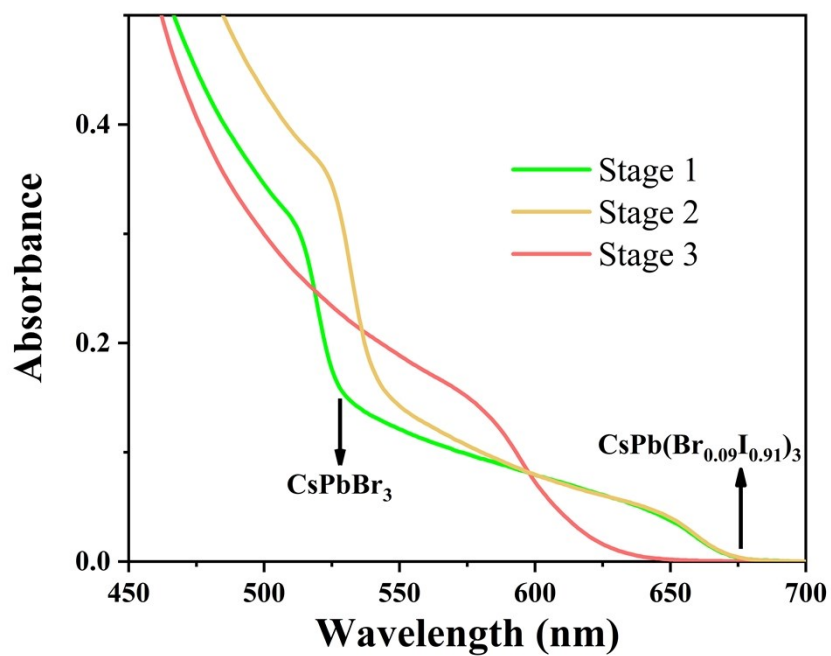

Figure S7: Absorption spectra at different stages of the anion exchange process between  $\text{CsPbBr}_3$  and  $\text{CsPb}(\text{Br}_{0.09}/\text{I}_{0.91})_3$  PNCs.
